# Supplementary material
Source: publisher site journal article supplement (https://www.dovepress.com/article/397134)
Supplement: Supplementary file 1 [file get_supplementary_file.php]

**Supplementary formula 1:**

The formula is：

where Intercept is the Lasso regression intercept, n is the total number of features screened by the Lasso algorithm, coefficient[i] is the Lasso coefficient of the ith feature, and Feature[i] is the ith feature.
